# Supplementary material
Source: PubMed Central journal article supplement (PMC7395676)
Supplement: NIHMS1607987-supplement-Supplementary_Figure_1.pdf [file NIHMS1607987-supplement-Supplementary_Figure_1.pdf]

# Supplementary Figure 1

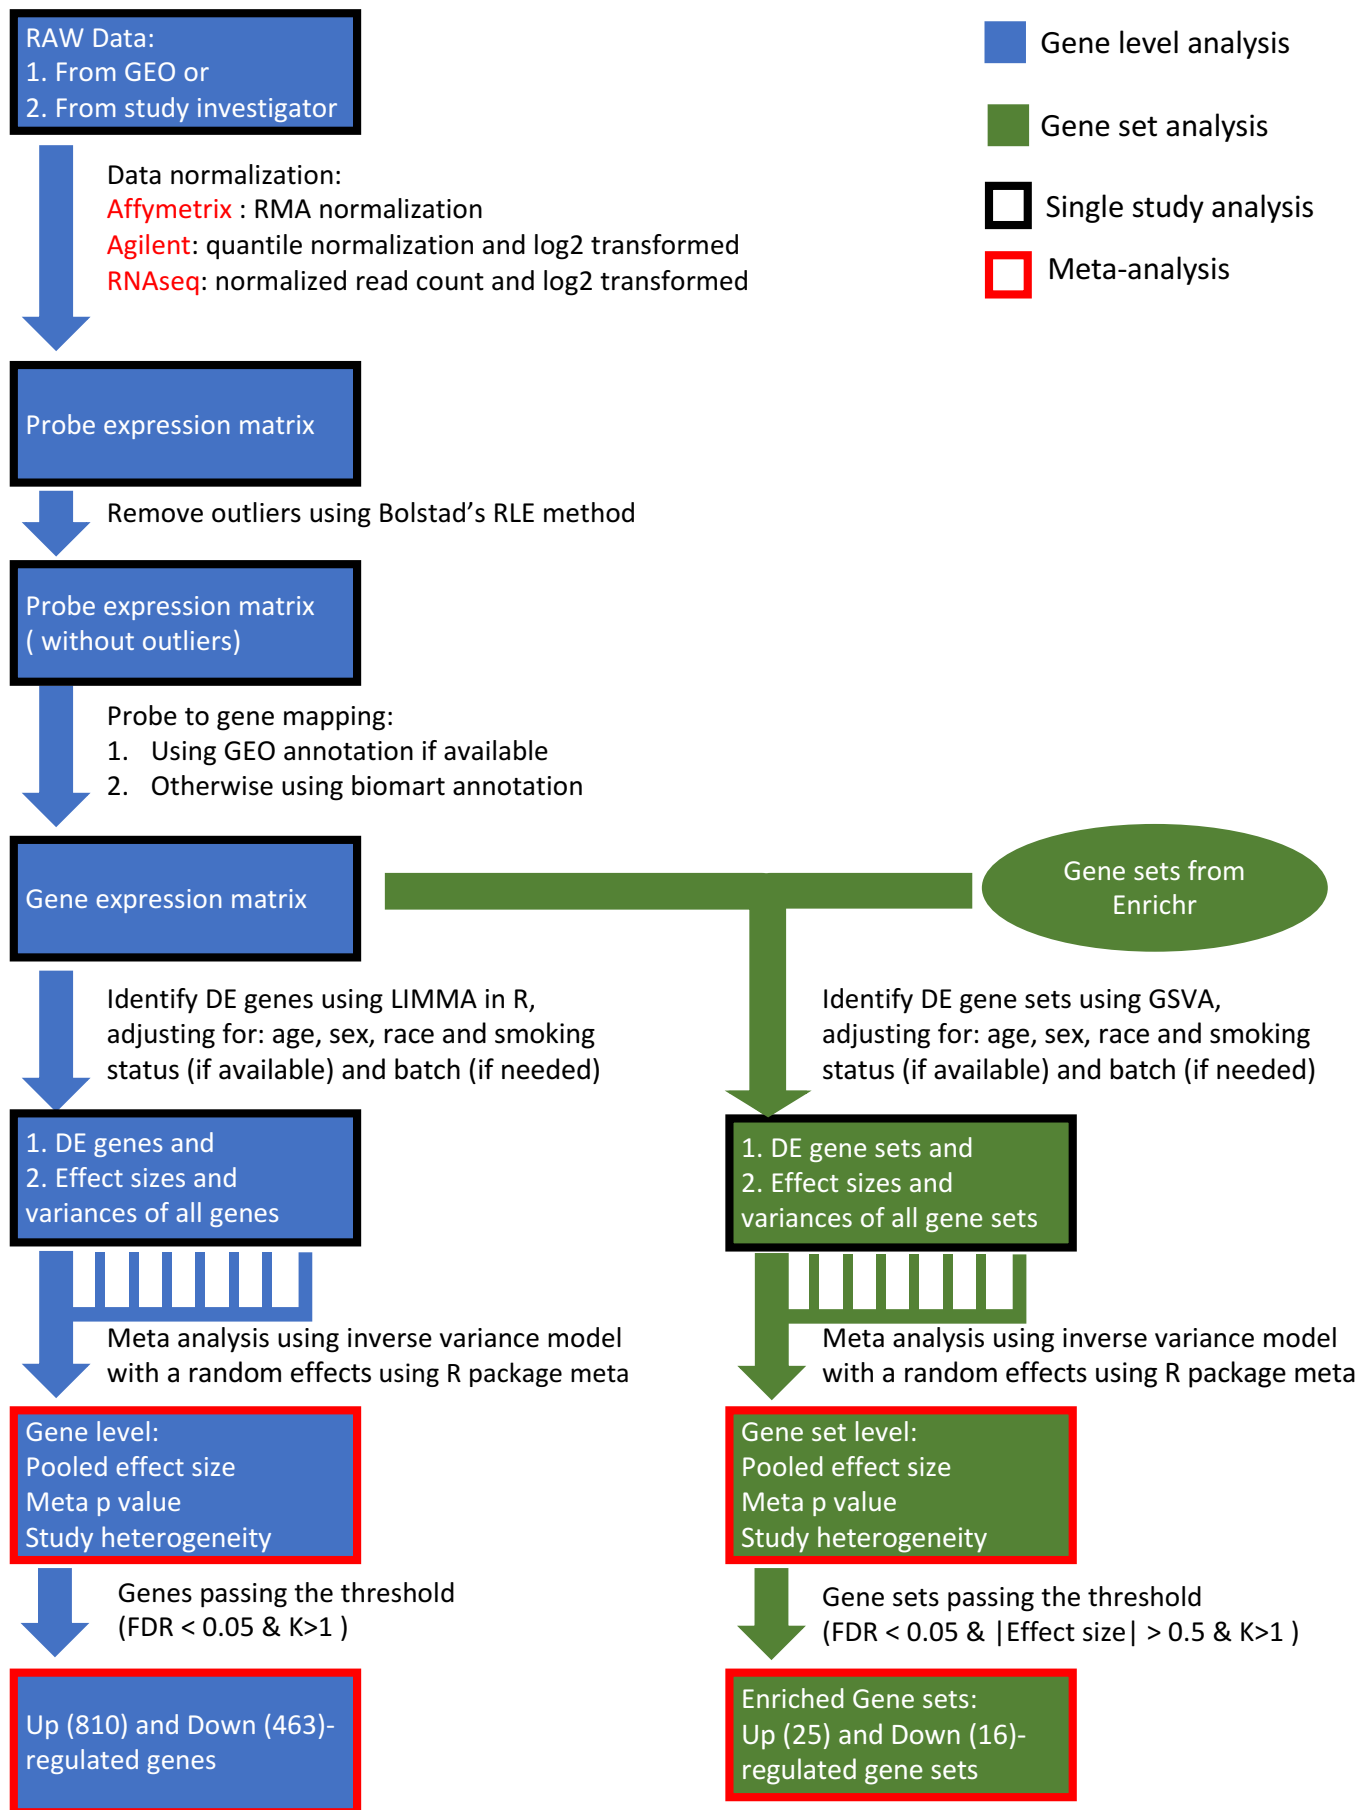

**Supplementary Figure 1. Flowchart of workflow from data acquisition through meta-analysis.**
