# Supplementary material
Source: PubMed Central journal article supplement (PMC7395676)
Supplement: NIHMS1607987-supplement-Supplementary_Figure_3.pdf [file NIHMS1607987-supplement-Supplementary_Figure_3.pdf]

### Supplementary Figure 3

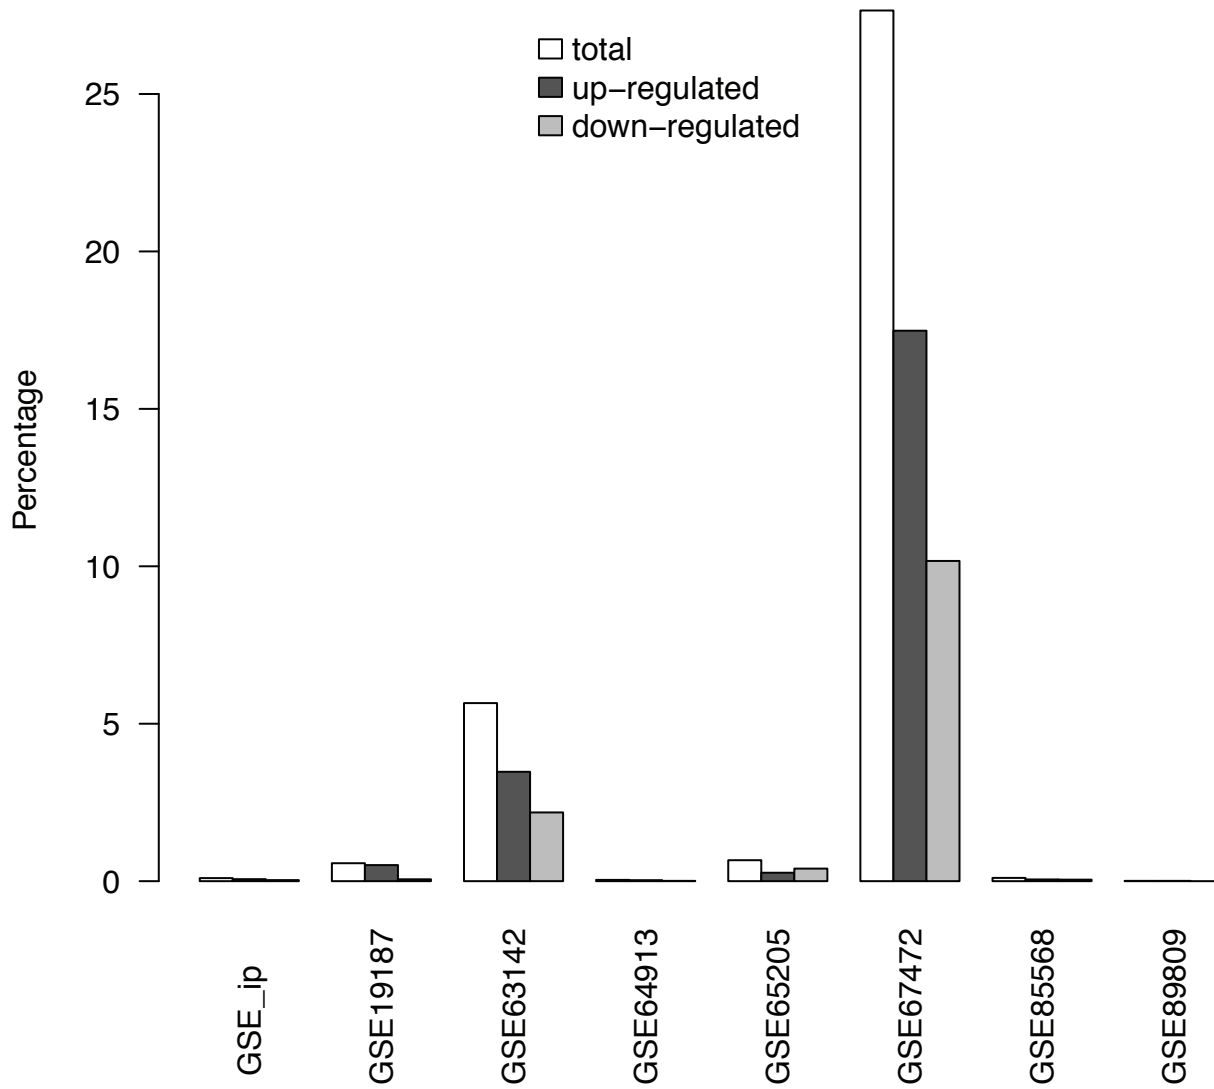

**Supplementary Figure 3. Proportion of DEGs in each study.** Values are expressed as the number of DEGs divided by the number of genes tested (platform specific), x 100.
