# Supplementary material
Source: PubMed Central journal article supplement (PMC7395676)
Supplement: NIHMS1607987-supplement-Supplementary_Figure_4.pdf [file NIHMS1607987-supplement-Supplementary_Figure_4.pdf]

# Supplementary Figure 4

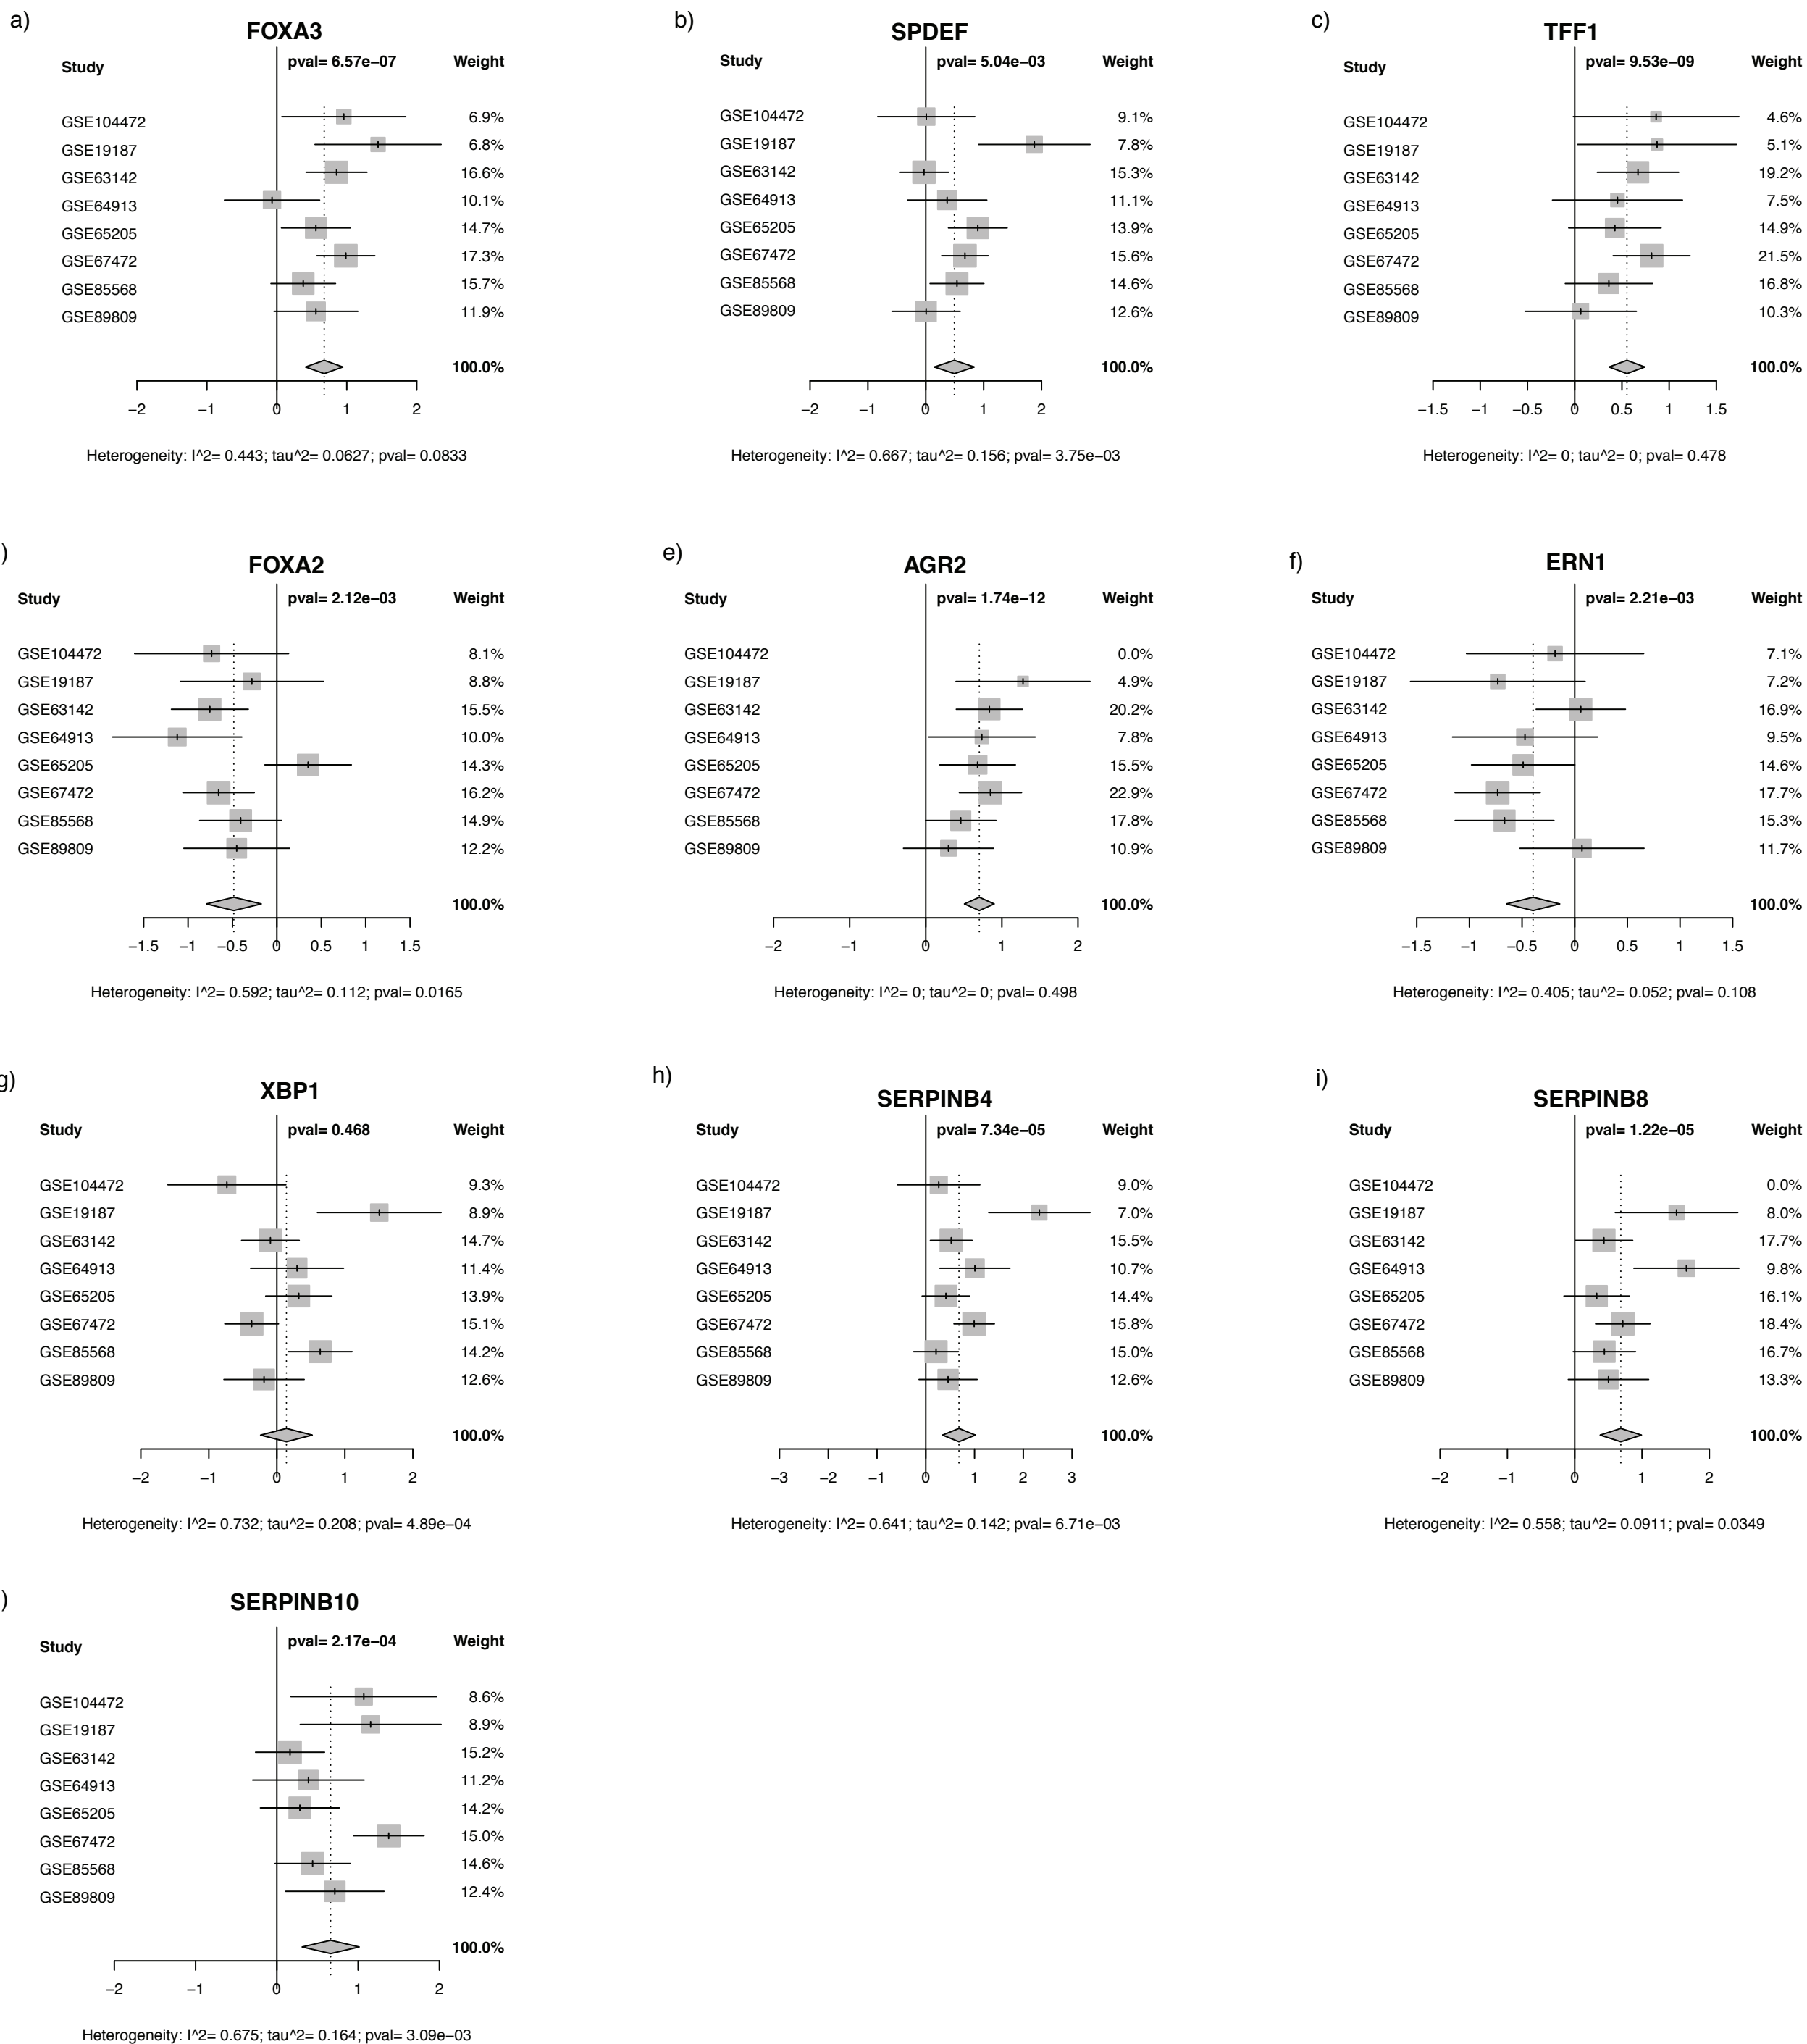

# Supplementary Figure 4

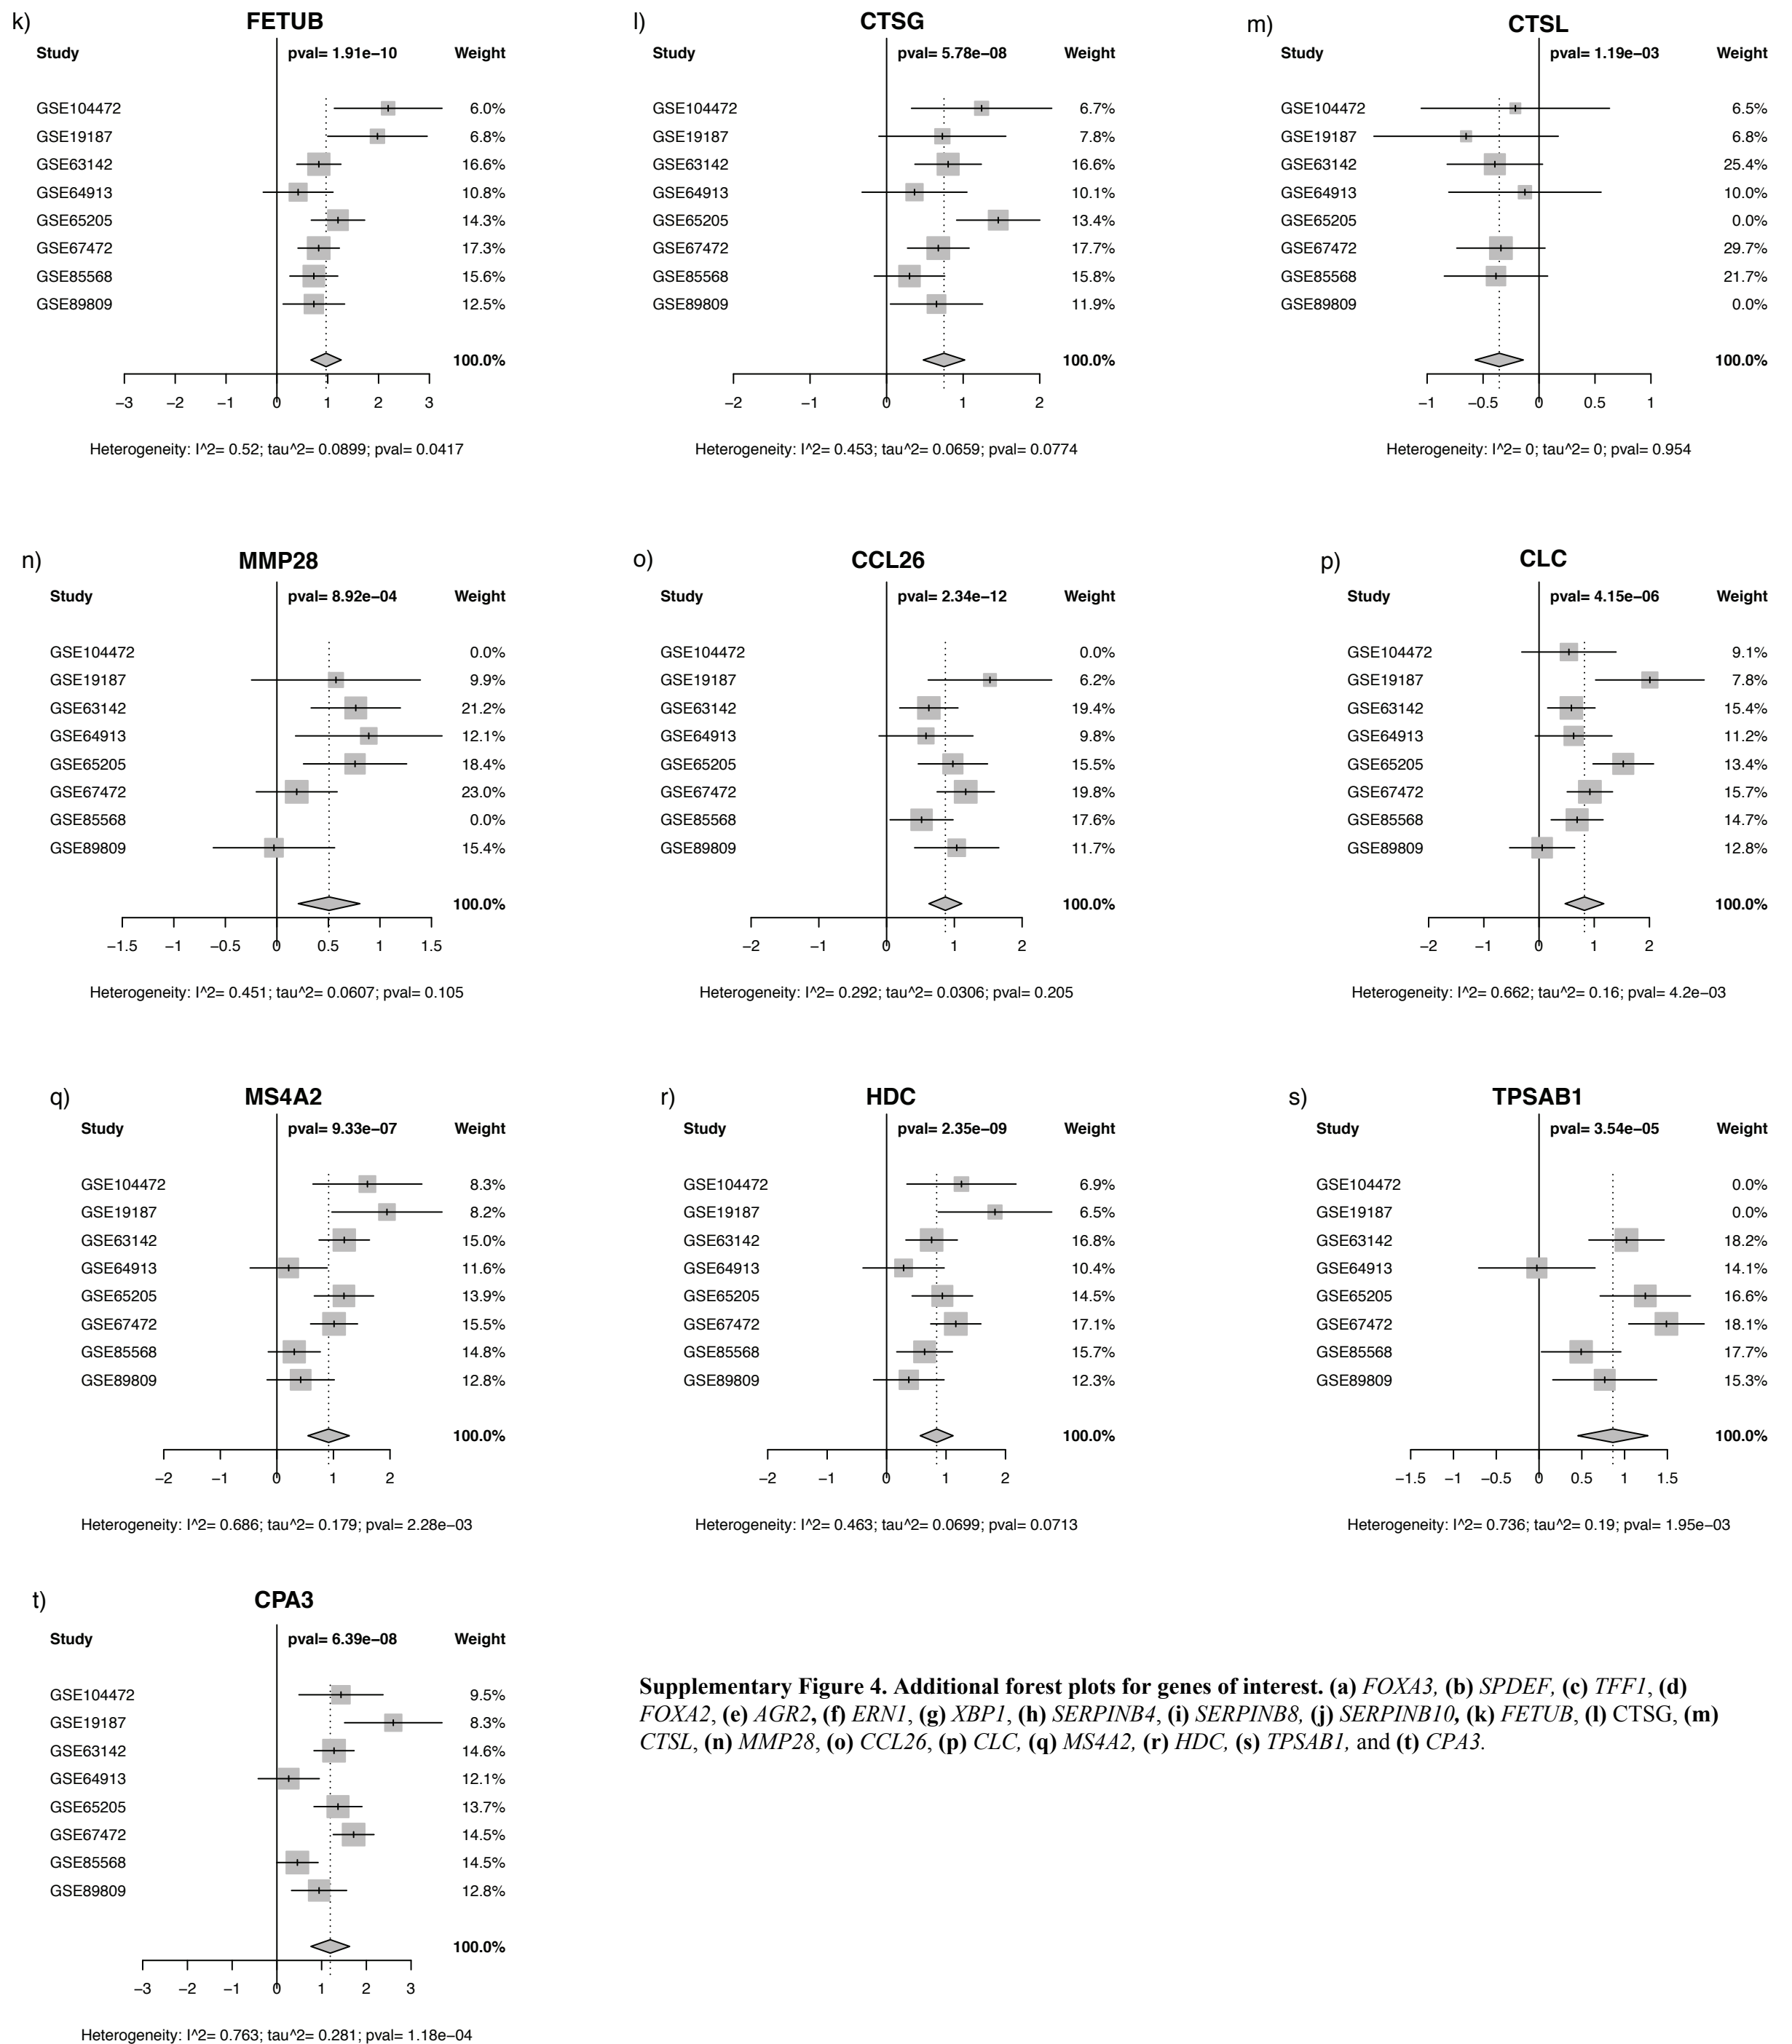

**Supplementary Figure 4. Additional forest plots for genes of interest. (a) FOXA3, (b) SPDEF, (c) TFF1, (d) FOXA2, (e) AGR2, (f) ERN1, (g) XBPI, (h) SERPINB4, (i) SERPINB8, (j) SERPINB10, (k) FETUB, (l) CTSG, (m) CTSL, (n) MMP28, (o) CCL26, (p) CLC, (q) MS4A2, (r) HDC, (s) TPSAB1, and (t) CPA3.**
