# Supplementary material
Source: PubMed Central journal article supplement (PMC7395676)
Supplement: NIHMS1607987-supplement-Supplementary_Figure_5.pdf [file NIHMS1607987-supplement-Supplementary_Figure_5.pdf]

# Supplementary Figure 5

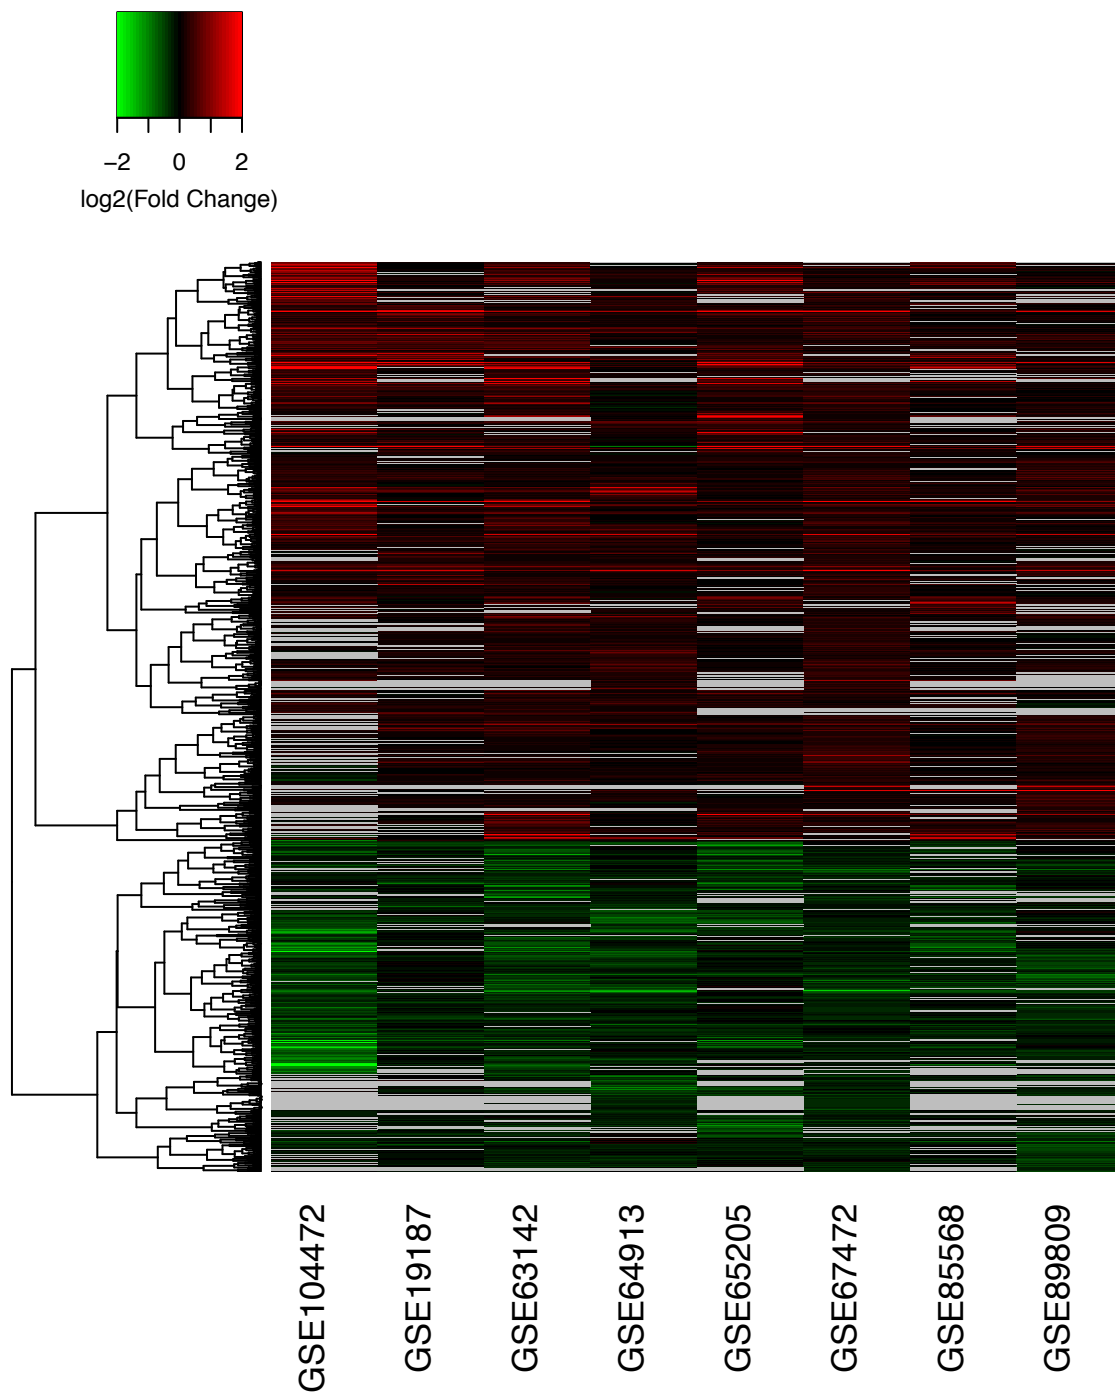

**Supplementary Figure 5. Expression of all significant DEGs across the eight studies.** Data for 1273 genes shown. Absolute log<sub>2</sub> fold change values > than 2 or < -2 were set to 2 or -2.
